# Supplementary material for: Fluorescent carbon nanomaterials: “quantum dots” or nanoclusters?
Source: Royal Society of Chemistry journal article supplement (doi:10.1039/c4cp00138a), 2014-01-01
Supplement: c4cp00138a1.pdf [file c4cp00138a1.pdf]

## Supporting Information

**Figure S1.**

Fluorescence quenching of “blue” C-dots with iodine ion displayed as Stern-Volmer plots. Measurements were carried out at excitation 350 nm and emission 445 nm.

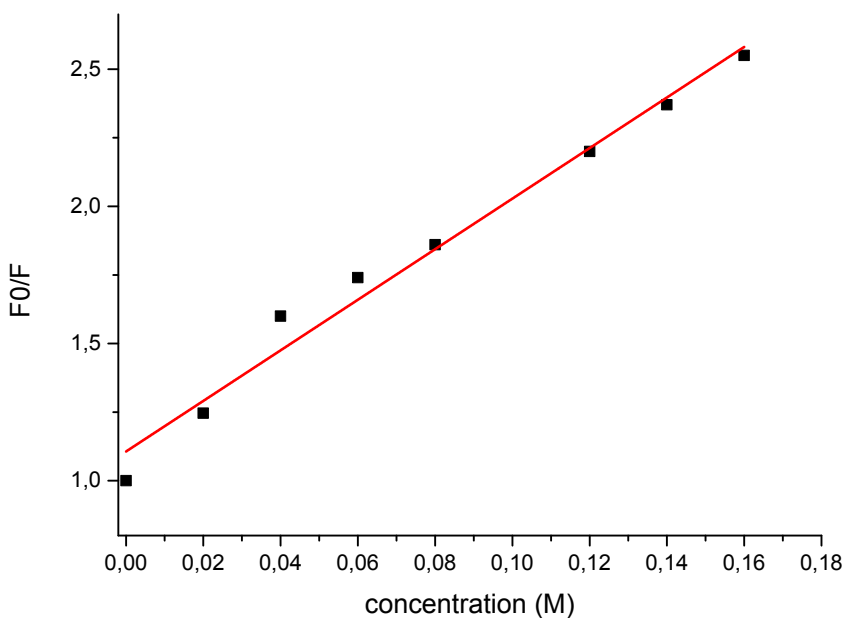

**Figure S2.** Fluorescence quenching of “green” C-dots with iodine ion displayed as Stern-Volmer plots. Measurements were carried out at excitation 420 nm and emission 525 nm.

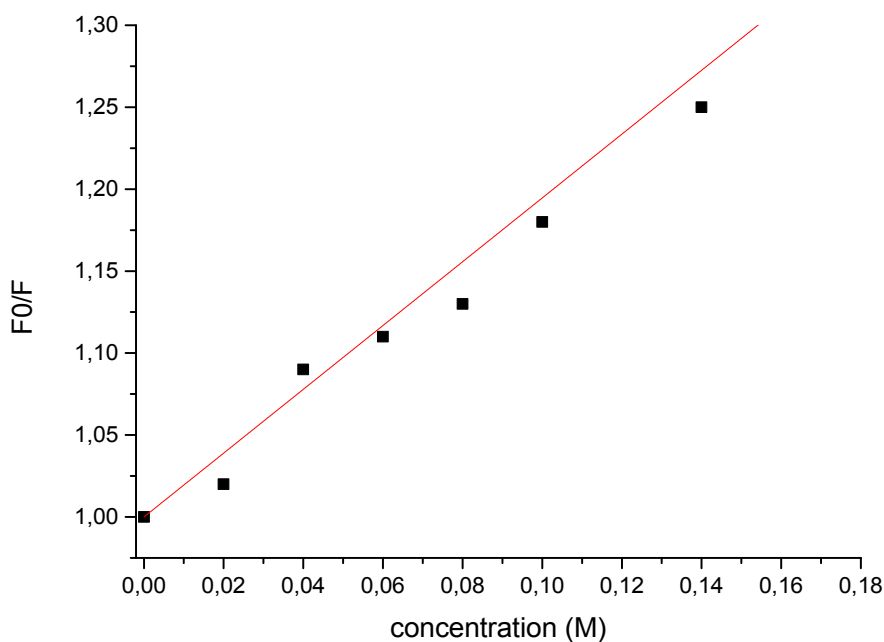

**Figure S3.** Fluorescence decays of “blue” C-dots at different emission wavelengths and their analysis. Excitations at 330 and 380 nm.

$$\lambda_{\text{exc}} = 330 \text{ nm}$$

with DEG (1:1)

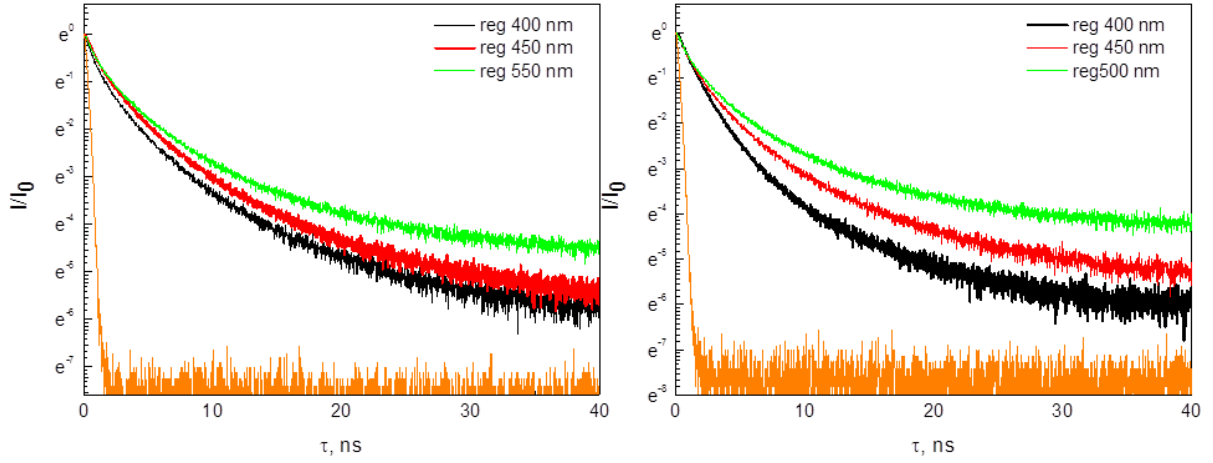

$$\lambda_{\text{exc}} = 380 \text{ nm}$$

with DEG (1:1)

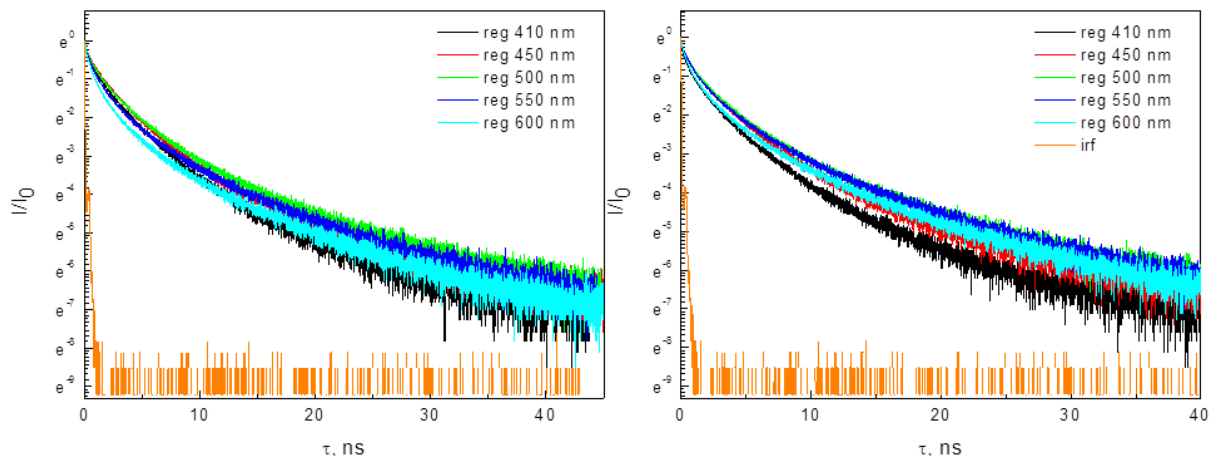

$$\lambda_{\text{exc}} = 330 \text{ nm}$$

|          |     | $\lambda_{\text{reg}} = 400 \text{ nm}$ | $\lambda_{\text{reg}} = 450 \text{ nm}$ | $\lambda_{\text{reg}} = 500 \text{ nm}$ |
|----------|-----|-----------------------------------------|-----------------------------------------|-----------------------------------------|
| $\tau_1$ |     | 0,673                                   | 0,928                                   | 0,973                                   |
|          | DEG | 0,703                                   | 0,713                                   | 0,830                                   |
| $\beta$  |     | 0,513                                   | 0,542                                   | 0,522                                   |
|          | DEG | 0,579                                   | 0,516                                   | 0,502                                   |

$$\lambda_{\text{exc}} = 380 \text{ nm}$$

|          |     | $\lambda_{\text{reg}} = 410 \text{ nm}$ | $\lambda_{\text{reg}} = 450 \text{ nm}$ | $\lambda_{\text{reg}} = 500 \text{ nm}$ | $\lambda_{\text{reg}} = 550 \text{ nm}$ | $\lambda_{\text{reg}} = 600 \text{ nm}$ |
|----------|-----|-----------------------------------------|-----------------------------------------|-----------------------------------------|-----------------------------------------|-----------------------------------------|
| $\tau_1$ |     | 1,196                                   | 1,261                                   | 1,055                                   | 0,591                                   | 0,304                                   |
|          | DEG | 0,889                                   | 1,139                                   | 0,989                                   | 0,761                                   | 0,457                                   |
| $\beta$  |     | 0,609                                   | 0,597                                   | 0,537                                   | 0,466                                   | 0,413                                   |
|          | DEG | 0,560                                   | 0,581                                   | 0,526                                   | 0,488                                   | 0,440                                   |

**Figure S4.** Fluorescence decays of “green” C-dots at different emission wavelengths and their analysis. Excitations at 380 nm and 440 nm.

$\lambda_{\text{ex}} = 380 \text{ nm}$

with DEG (1:1)

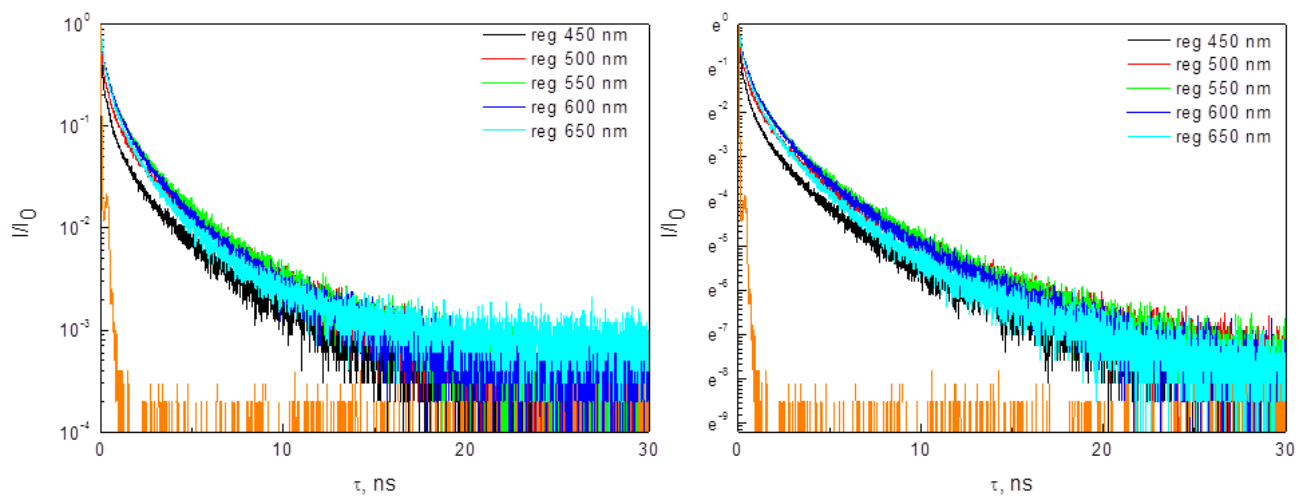

$\lambda_{\text{ex}} = 440 \text{ nm}$

with DEG (1:1)

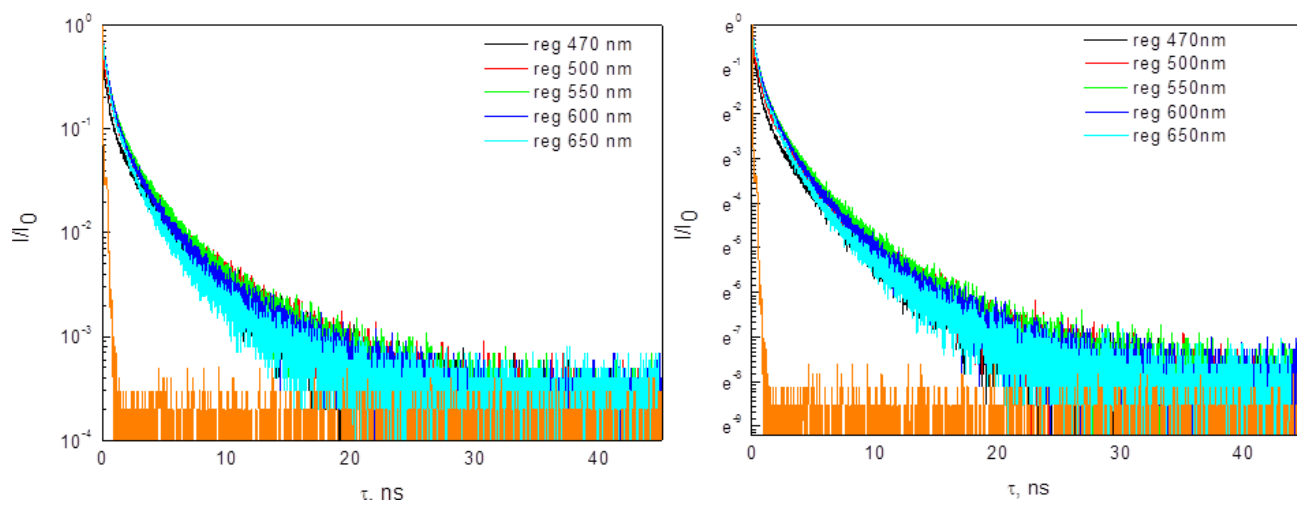

$\lambda_{exc}=380 \text{ nm}$

|          |     | $\lambda_{reg}=450 \text{ nm}$ | $\lambda_{reg}=500 \text{ nm}$ | $\lambda_{reg}=550 \text{ nm}$ | $\lambda_{reg}=600 \text{ nm}$ | $\lambda_{reg}=650 \text{ nm}$ |
|----------|-----|--------------------------------|--------------------------------|--------------------------------|--------------------------------|--------------------------------|
| $\tau_1$ |     | 0,014                          | 0,049                          | 0,090                          | 0,078                          | 0,048                          |
|          | DEG | 0,077                          | 0,113                          | 0,186                          | 0,184                          | 0,111                          |
| $\beta$  |     | 0,299                          | 0,347                          | 0,390                          | 0,391                          | 0,371                          |
|          | DEG | 0,367                          | 0,382                          | 0,421                          | 0,430                          | 0,402                          |

$\lambda_{exc}=440 \text{ nm}$

|          |     | $\lambda_{reg}=470 \text{ nm}$ | $\lambda_{reg}=500 \text{ nm}$ | $\lambda_{reg}=540 \text{ nm}$ | $\lambda_{reg}=600 \text{ nm}$ | $\lambda_{reg}=650 \text{ nm}$ |
|----------|-----|--------------------------------|--------------------------------|--------------------------------|--------------------------------|--------------------------------|
| $\tau_1$ |     | 0,065                          | 0,089                          | 0,066                          | 0,055                          | 0,041                          |
|          | DEG | 0,096                          | 0,155                          | 0,096                          | 0,182                          | 0,124                          |
| $\beta$  |     | 0,361                          | 0,381                          | 0,371                          | 0,371                          | 0,364                          |
|          | DEG | 0,379                          | 0,409                          | 0,380                          | 0,436                          | 0,415                          |

**Figure S5.** Anisotropy decays of “blue” carbon dots and their analysis. Excitation 330 nm.

$\lambda_{\text{ex}} = 330 \text{ nm}$

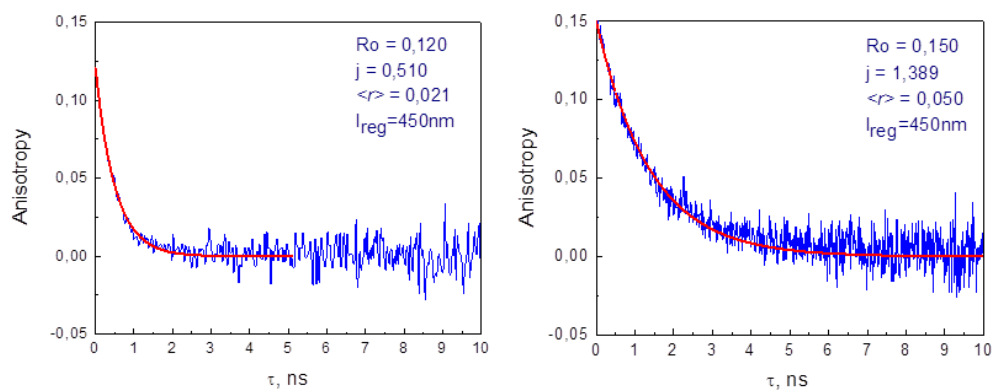

|                     |     | $\lambda_{\text{reg}}=400 \text{ nm}$ | $\lambda_{\text{reg}}=450 \text{ nm}$ | $\lambda_{\text{reg}}=500 \text{ nm}$ |
|---------------------|-----|---------------------------------------|---------------------------------------|---------------------------------------|
| $R_0$               |     | 0.131                                 | 0.120                                 | 0.099                                 |
|                     | DEG | 0.155                                 | 0.150                                 | 0.135                                 |
| $\varphi$           |     | 0.481                                 | 0.510                                 | 0.618                                 |
|                     | DEG | 1.029                                 | 1.389                                 | 1.601                                 |
| $\langle r \rangle$ |     | 0.026                                 | 0.021                                 | 0.017                                 |
|                     | DEG | 0.050                                 | 0.050                                 | 0.038                                 |

**Figure S6.** Anisotropy decays of “blue” carbon dots and their analysis. Excitation 380 nm.

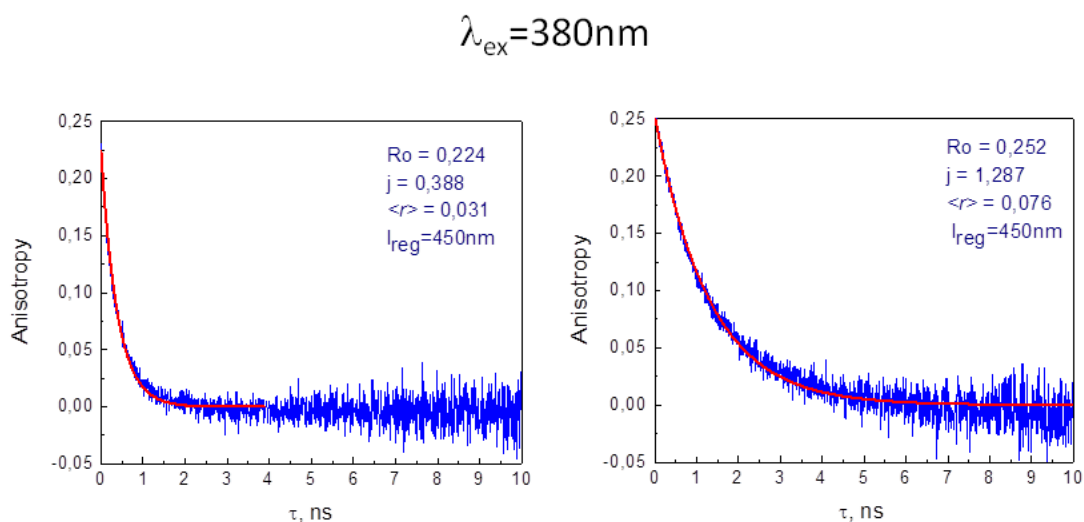

|                     |     | $\lambda_{reg}=410\text{ nm}$ | $\lambda_{reg}=450\text{ nm}$ | $\lambda_{reg}=500\text{ nm}$ | $\lambda_{reg}=550\text{ nm}$ | $\lambda_{reg}=600\text{ nm}$ |
|---------------------|-----|-------------------------------|-------------------------------|-------------------------------|-------------------------------|-------------------------------|
| $R_0$               |     | 0.187                         | 0.224                         | 0.206                         | 0.162                         | 0.145                         |
|                     | DEG | 0.272                         | 0.252                         | 0.244                         | 0.186                         | 0.157                         |
| $\varphi$           |     | 0.358                         | 0.388                         | 0.404                         | 0.432                         | 0.457                         |
|                     | DEG | 1.069                         | 1.287                         | 1.520                         | 1.646                         | 1.760                         |
| $\langle r \rangle$ |     | 0.027                         | 0.031                         | 0.030                         | 0.027                         | 0.027                         |
|                     | DEG | 0.082                         | 0.076                         | 0.076                         | 0.063                         | 0.061                         |

**Figure S7.** Anisotropy decays of “green” carbon dots and their analysis. Excitation at 380 and 440 nm.

$\lambda_{\text{ex}} = 380 \text{ nm}$

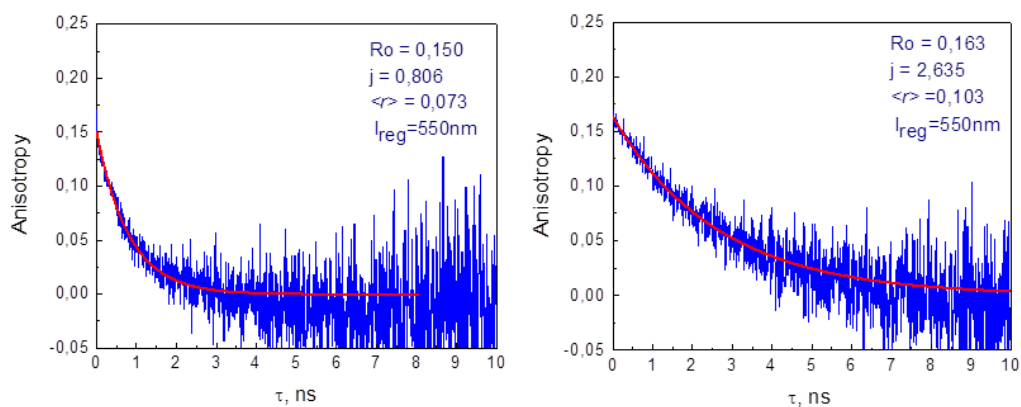

|                     |     | $\lambda_{\text{reg}}=450 \text{ nm}$ | $\lambda_{\text{reg}}=500 \text{ nm}$ | $\lambda_{\text{reg}}=550 \text{ nm}$ | $\lambda_{\text{reg}}=600 \text{ nm}$ | $\lambda_{\text{reg}}=650 \text{ nm}$ |
|---------------------|-----|---------------------------------------|---------------------------------------|---------------------------------------|---------------------------------------|---------------------------------------|
| $R_0$               |     | 0.141                                 | 0.170                                 | 0.150                                 | 0.131                                 | 0.125                                 |
|                     | DEG | -                                     | 0.203                                 | 0.163                                 | 0.127                                 | 0.099                                 |
| $\varphi$           |     | 0.831                                 | 0.788                                 | 0.806                                 | 0.771                                 | 1.032                                 |
|                     | DEG | -                                     | 2.481                                 | 2.635                                 | 2.712                                 | 2.682                                 |
| $\langle r \rangle$ |     | 0.087                                 | 0.087                                 | 0.073                                 | 0.063                                 | 0.067                                 |
|                     | DEG | -                                     | 0.125                                 | 0.103                                 | 0.083                                 | 0.067                                 |

$\lambda_{\text{ex}} = 440 \text{ nm}$

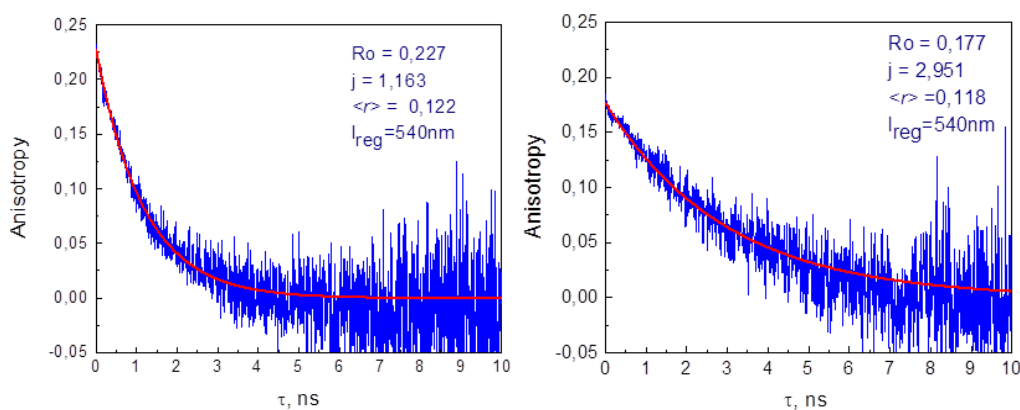

|                     |     | $\lambda_{\text{reg}}=500 \text{ nm}$ | $\lambda_{\text{reg}}=540 \text{ nm}$ | $\lambda_{\text{reg}}=600 \text{ nm}$ | $\lambda_{\text{reg}}=650 \text{ nm}$ |
|---------------------|-----|---------------------------------------|---------------------------------------|---------------------------------------|---------------------------------------|
| $R_0$               |     | 0.245                                 | 0.227                                 | 0.176                                 | 0.138                                 |
|                     | DEG | 0.204                                 | 0.177                                 | 0.145                                 | 0.109                                 |
| $\varphi$           |     | 1.027                                 | 1.163                                 | 1.057                                 | 1.051                                 |
|                     | DEG | 2.864                                 | 2.951                                 | 2.830                                 | 2.662                                 |
| $\langle r \rangle$ |     | 0.123                                 | 0.122                                 | 0.097                                 | 0.081                                 |
|                     | DEG | 0.137                                 | 0.118                                 | 0.098                                 | 0.076                                 |
